# Supplementary material for: Efficiency of Natural Deep Eutectic Solvents to Extract Phenolic Compounds from Agrimonia eupatoria: Experimental Study and In Silico Modelling
Source: MDPI journal article supplement (doi:10.3390/plants11182346), 2022-09-08
Supplement: s1 [file s1]

# Efficiency of natural deep eutectic solvents to extract flavonol glycosides from *Agrimonia eupatoria*: experimental study supported by COSMO-RS

Mila Lazović<sup>1\*</sup>, Ilija Cvijetić<sup>2\*</sup>, Milica Jankov<sup>1</sup>, Dušanka Milojković-Opsenica<sup>2</sup>, Jelena Trifković<sup>2\*\*</sup>, Petar Ristivojević<sup>2</sup>

<sup>1</sup> Innovation Centre of Faculty of Chemistry Ltd, Studentski trg 12-16, 11158 Belgrade, Serbia

<sup>2</sup> University of Belgrade – Faculty of Chemistry, Studentski trg 12-16, 11158 Belgrade, Serbia

\* Equally contributed

\*\*Correspondence: jvelicko@chem.bg.ac.rs

## Supplementary materials

List of tables and figures:

**Table S1** Influence of water content TPC, TFC and RSA values of *A. eupatoria* obtained using three different NADES (mean  $\pm$  standard deviation from duplicate).

**Table S2** Influence of water content on phenolic compositions of *A. eupatoria* obtained from three different NADESs (expressed as mg/kg of dried sample).

**Table S3** TPC, TFC and RSA of *A. eupatoria* obtained using NADES and methanol (mean  $\pm$  standard deviation from duplicate).

**Table S4** Paired t-test.

**Table S5** The  $\beta^\infty$  values for 5 phenolic compounds from *A. eupatoria* in nine NADES solvents, methanol and water.

**Table S6** The  $\beta^\infty_{\text{NADES}}/\beta^\infty_{\text{water}}$  values for 5 phenolic compounds in nine NADES solvents. The values show relative extractability of a solute in NADES solvent compared with pure water.

**Table S7** The logP values for five most abundant phenolic compounds in *A. eupatoria* extract predicted by COSMO-RS.

**Figure S1** The sigma profiles of rutin and NADES 2 (choline chloride: tartaric acid 1:1). The surface charge density of rutin is shown in the upper left part of the graph.

**Figure S2** The sigma profiles of isoquercetin and NADES 5 (choline chloride: glycerol 1:1). The surface charge density of isoquercetin is shown in the upper left part of the graph.

Table S1 Influence of water content TPC, TFC and RSA values of *A. eupatoria* obtained using three different NADES (mean  $\pm$  standard deviation from duplicate).

| water content<br>% w/w              | RSA             | TPC              | TFC              |
|-------------------------------------|-----------------|------------------|------------------|
|                                     | mmol TE/kg      | g GAE/kg         | g RUE/kg         |
| Choline chloride: Tartaric acid 1:1 |                 |                  |                  |
| 20%                                 | 260.1 $\pm$ 1.9 | 25.74 $\pm$ 0.59 | 38.1 $\pm$ 1.1   |
| 30%                                 | 258 $\pm$ 23    | 26.56 $\pm$ 0.99 | 39.5 $\pm$ 5.0   |
| 40%                                 | 275 $\pm$ 21    | 26.52 $\pm$ 0.94 | 45.5 $\pm$ 0.4   |
| 50%                                 | 351 $\pm$ 23    | 34.3 $\pm$ 1.1   | 50.9 $\pm$ 6.5   |
| Choline chloride: Urea 1:2          |                 |                  |                  |
| 20%                                 | 395 $\pm$ 20    | 40.00 $\pm$ 0.86 | 67.79 $\pm$ 0.86 |
| 30%                                 | 376 $\pm$ 22    | 37.17 $\pm$ 0.96 | 52.3 $\pm$ 6.0   |
| 40%                                 | 445 $\pm$ 22    | 43.00 $\pm$ 0.56 | 51.60 $\pm$ 0.26 |
| 50%                                 | 317 $\pm$ 2     | 32.66 $\pm$ 0.60 | 39.3 $\pm$ 2.3   |
| Choline chloride: Succinic acid 1:1 |                 |                  |                  |
| 20%                                 | 196.6 $\pm$ 4.3 | 19.64 $\pm$ 0.11 | 22.2 $\pm$ 1.8   |
| 30%                                 | 107.7 $\pm$ 9.2 | 9.96 $\pm$ 0.22  | 13.52 $\pm$ 0.42 |
| 40%                                 | 479.6 $\pm$ 9.4 | 44.2 $\pm$ 1.1   | 55.9 $\pm$ 3.0   |
| 50%                                 | 330 $\pm$ 23    | 31.4 $\pm$ 1.4   | 45.3 $\pm$ 9.2   |

Table S2 Influence of water content on phenolic compositions of *A. eupatoria* obtained from three different NADESs (expressed as mg/kg of dried sample).

| water<br>content<br>(%w/w)          | Protocatechuic<br>acid | Syringic acid | Chlorogenic acid | p-Hydroxybenzoic<br>acid | Aesculetin | Caffeic acid | Isoorientin | Rutin  | Vitexin | Isoquercetin | p-Coumaric acid | Quercitrin | Astragalin | Rosmarinic acid | Luteolin | Quercetin | Naringenin | Kaempferol |
|-------------------------------------|------------------------|---------------|------------------|--------------------------|------------|--------------|-------------|--------|---------|--------------|-----------------|------------|------------|-----------------|----------|-----------|------------|------------|
| Choline chloride: Tartaric acid 1:1 |                        |               |                  |                          |            |              |             |        |         |              |                 |            |            |                 |          |           |            |            |
| 20%                                 | 10.09                  | 12.39         | 11.32            | 10.87                    | 1.91       | 2.81         | 0.75        | 64.57  | 15.87   | 316.3        | 4.04            | 460.9      | 152.1      | 1.92            | 0.43     | 170.5     | 1.62       | 5.92       |
| 30%                                 | 8.10                   | 8.87          | 17.27            | 18.48                    | 3.27       | 5.43         | 1.38        | 119.41 | 23.69   | 421.6        | 4.60            | 596.8      | 212.6      | 3.08            | 0.76     | 316.1     | 2.57       | 11.37      |
| 40%                                 | 5.85                   | 8.06          | 15.86            | 10.53                    | 3.29       | 5.04         | 1.12        | 112.36 | 22.67   | 433.1        | 3.80            | 618.6      | 220.1      | 3.45            | 0.65     | 62.8      | 1.03       | 3.13       |
| 50%                                 | 5.79                   | 6.64          | 21.89            | 9.54                     | 4.83       | 4.17         | 1.30        | 134.17 | 28.33   | 494.5        | 4.20            | 708.2      | 272.5      | 4.20            | 0.62     | 43.1      | 0.75       | 2.38       |
| Choline chloride: Urea 1:2          |                        |               |                  |                          |            |              |             |        |         |              |                 |            |            |                 |          |           |            |            |
| 20%                                 | 6.72                   | 15.21         | 43.74            | 14.81                    | NF         | 3.48         | 1.53        | 146.5  | 36.13   | 522.9        | 9.44            | 746.3      | 314.5      | 3.65            | 0.94     | 11.65     | 1.95       | 4.55       |
| 30%                                 | 4.55                   | 7.18          | 29.91            | 19.25                    | 1.70       | 1.82         | 1.66        | 130.3  | 28.49   | 496.3        | 7.01            | 693.8      | 264.6      | 2.85            | 0.86     | 15.84     | 1.35       | 3.35       |
| 40%                                 | 5.16                   | 4.91          | 31.48            | 22.54                    | 6.71       | 6.03         | 2.00        | 139.3  | 31.47   | 538.6        | 10.88           | 761.2      | 323.5      | 4.97            | 1.35     | 33.09     | 1.30       | 4.12       |
| 50%                                 | 6.62                   | 11.91         | 40.57            | 30.54                    | 7.12       | 5.62         | 1.53        | 129.6  | 27.87   | 491.8        | 11.48           | 681.8      | 269.7      | 4.19            | 1.03     | 13.98     | 1.37       | 3.20       |
| Choline chloride: Succinic acid 1:1 |                        |               |                  |                          |            |              |             |        |         |              |                 |            |            |                 |          |           |            |            |
| 20%                                 | 3.96                   | 2.52          | 9.21             | 10.57                    | 1.39       | 2.19         | 1.07        | 54.20  | 14.55   | 338.1        | 2.88            | 469.8      | 163.3      | 1.26            | 0.38     | 20.96     | 0.45       | 2.26       |
| 30%                                 | 2.70                   | 3.66          | 2.77             | 4.11                     | 1.09       | 1.81         | 0.25        | 22.90  | 5.10    | 163.3        | 0.80            | 210.6      | 74.7       | 0.63            | 0.15     | 16.10     | 0.25       | 2.12       |
| 40%                                 | 4.82                   | 3.11          | 18.21            | 17.41                    | 3.86       | 5.12         | 1.74        | 163.05 | 33.12   | 548.4        | 8.56            | 846.5      | 340.1      | 4.44            | 1.06     | 67.85     | 1.55       | 6.13       |
| 50%                                 | 4.21                   | 5.35          | 17.41            | 25.63                    | 2.70       | 3.77         | 1.04        | 110.62 | 23.02   | 471.9        | 4.46            | 675.9      | 254.2      | 2.66            | 0.59     | 35.11     | 0.85       | 2.44       |

Table S3 TPC, TFC and RSA of *A. eupatoria* obtained using NADES and methanol (mean  $\pm$  standard deviation from duplicate).

| Solvents | RSA<br>mmol TE/kg | TPC<br>g GAE/kg  | TFC<br>g RUE/kg  |
|----------|-------------------|------------------|------------------|
| NADES1   | 263.4 $\pm$ 8.7   | 38.83 $\pm$ 0.57 | 54.9 $\pm$ 2.1   |
| NADES2   | 260.1 $\pm$ 1.9   | 25.74 $\pm$ 0.59 | 38.1 $\pm$ 1.1   |
| NADES3   | 397 $\pm$ 20      | 40.00 $\pm$ 0.86 | 67.79 $\pm$ 0.86 |
| NADES4   | 196.6 $\pm$ 4.3   | 19.64 $\pm$ 0.11 | 22.2 $\pm$ 1.8   |
| NADES5   | 413 $\pm$ 35      | 41.6 $\pm$ 1.1   | 57.2 $\pm$ 4.2   |
| NADES6   | 446 $\pm$ 37      | 39.10 $\pm$ 0.66 | 53.7 $\pm$ 2.1   |
| NADES7   | 296 $\pm$ 14      | 24.46 $\pm$ 0.14 | 35.4 $\pm$ 2.6   |
| NADES8   | 270 $\pm$ 11      | 33.20 $\pm$ 0.59 | 44.8 $\pm$ 3.7   |
| NADES9   | 75.6 $\pm$ 4.3    | 8.32 $\pm$ 0.19  | 10.69 $\pm$ 0.18 |
| MeOH     | 416.0 $\pm$ 0.6   | 35.73 $\pm$ 0.56 | 60.4 $\pm$ 5.2   |

Table S4 Paired  $t$ -test.

|                  | $t^*$ | $P$  |
|------------------|-------|------|
| MeOH vs NADES1   | 1.10  | 0.29 |
| MeOH vs NADES2   | 1.09  | 0.29 |
| MeOH vs NADES3   | 2.21  | 0.04 |
| MeOH vs NADES4   | 2.01  | 0.06 |
| MeOH vs NADES5   | 2.22  | 0.04 |
| MeOH vs NADES6   | 1.43  | 0.17 |
| MeOH vs NADES7   | 0.33  | 0.74 |
| MeOH vs NADES8   | 1.29  | 0.22 |
| MeOH vs NADES9   | 1.82  | 0.09 |
| NADES1 vs NADES2 | 2.31  | 0.03 |
| NADES1 vs NADES3 | 0.48  | 0.64 |
| NADES1 vs NADES4 | 2.67  | 0.02 |
| NADES1 vs NADES5 | 1.35  | 0.19 |
| NADES1 vs NADES6 | 0.44  | 0.67 |
| NADES1 vs NADES7 | 1.21  | 0.24 |
| NADES1 vs NADES8 | 0.82  | 0.42 |
| NADES1 vs NADES9 | 2.45  | 0.03 |
| NADES2 vs NADES3 | 1.55  | 0.14 |
| NADES2 vs NADES4 | 0.95  | 0.36 |
| NADES2 vs NADES5 | 1.76  | 0.10 |
| NADES2 vs NADES6 | 1.24  | 0.23 |
| NADES2 vs NADES7 | 1.06  | 0.31 |
| NADES2 vs NADES8 | 1.34  | 0.20 |
| NADES2 vs NADES9 | 2.49  | 0.02 |
| NADES3 vs NADES4 | 2.30  | 0.03 |
| NADES3 vs NADES5 | 1.96  | 0.07 |
| NADES3 vs NADES6 | 2.56  | 0.02 |
| NADES3 vs NADES7 | 2.67  | 0.02 |
| NADES3 vs NADES8 | 1.73  | 0.10 |
| NADES3 vs NADES9 | 2.02  | 0.06 |
| NADES4 vs NADES5 | 2.19  | 0.04 |
| NADES4 vs NADES6 | 2.04  | 0.06 |
| NADES4 vs NADES7 | 2.01  | 0.06 |
| NADES4 vs NADES8 | 2.23  | 0.04 |
| NADES4 vs NADES9 | 1.54  | 2.11 |
| NADES5 vs NADES6 | 2.30  | 0.03 |
| NADES5 vs NADES7 | 2.31  | 0.03 |
| NADES5 vs NADES8 | 2.07  | 0.05 |
| NADES5 vs NADES9 | 2.03  | 0.06 |
| NADES6 vs NADES7 | 2.03  | 0.06 |
| NADES6 vs NADES8 | 0.44  | 0.67 |
| NADES6 vs NADES9 | 1.84  | 0.08 |
| NADES7 vs NADES8 | 1.46  | 0.16 |
| NADES7 vs NADES9 | 1.81  | 0.09 |
| NADES8 vs NADES9 | 1.97  | 0.06 |

\*  $t_{cr} = 2.11$

Table S5 The  $\beta_{\infty}$  values for 5 phenolic compounds from *A. eupatoria* in nine NADES solvents, methanol and water.

|              | Pro:MA<br>(1) | ChCl:TA<br>(2) | ChCl:Urea<br>(3) | ChCl:SA<br>(4) | ChCl:Gl<br>(5) | Gl:Urea<br>(6) | Gl:Urea<br>2:1 (7) | Gl:LA<br>(8) | Gl:AA<br>(9) | MeOH | H <sub>2</sub> O<br>( $\times 10^{-3}$ ) |
|--------------|---------------|----------------|------------------|----------------|----------------|----------------|--------------------|--------------|--------------|------|------------------------------------------|
| Isoquercetin | 8.9           | 24.0           | 3.2              | 5.7            | 21.0           | 1.4            | 4.0                | 4.1          | 1.5          | 82.1 | 0.96                                     |
| Rutin        | 111           | 400            | 1.6              | 18.8           | 11.3           | 0.5            | 1.6                | 2.5          | 1.6          | 50.9 | 0.16                                     |
| Quercitrin   | 5.4           | 9.4            | 2.4              | 4.1            | 54.7           | 1.0            | 3.2                | 3.8          | 1.3          | 92.7 | 0.31                                     |
| Astragalin   | 15.8          | 36.6           | 1.4              | 7.3            | 23.9           | 0.5            | 1.4                | 2.1          | 1.2          | 26.0 | 0.39                                     |
| Quercetin    | 2.4           | 2.7            | 124              | 11.8           | 983            | 83.4           | 298                | 179          | 20.8         | 7527 | 27                                       |

Table S6 The  $\beta_{NADES}^{\infty}/\beta_{water}^{\infty}$  values for 5 phenolic compounds in nine NADES solvents. The values show relative extractability of a solute in NADES solvent compared with pure water.

|              | L-Pro:MA<br>(1) | ChCl:TA<br>(2) | ChCl:Urea<br>(3) | ChCl:SA<br>(4) | ChCl:Gl<br>(5) | Gl:Urea<br>(6) | Gl:Urea<br>2:1 (7) | Gl:LA<br>(8) | Gl:AA<br>(9) |
|--------------|-----------------|----------------|------------------|----------------|----------------|----------------|--------------------|--------------|--------------|
| Isoquercetin | 9333            | 25064          | 3370             | 60101          | 22015          | 1497           | 4204               | 4286         | 1533         |
| Rutin        | 680110          | 2453642        | 10084            | 115244         | 69056          | 3297           | 9531               | 15421        | 9856         |
| Quercitrin   | 17509           | 30805          | 7754             | 13388          | 178288         | 3306           | 10391              | 12365        | 4134         |
| Astragalin   | 40223           | 93092          | 3648             | 18655          | 60960          | 1338           | 3522               | 5272         | 2940         |
| Quercetin    | 91.1            | 99.3           | 4623             | 442.0          | 36721          | 3116           | 11125              | 6721         | 777.7        |

Table S7 The logP values for five most abundant phenolic compounds in *A. eupatoria* extract predicted by COSMO-RS.

| Compound     | logP  |
|--------------|-------|
| Isoquercetin | 1.877 |
| Rutin        | 1.925 |
| Quercitrin   | 2.766 |
| Astragalin   | 2.108 |
| Quercetin    | 3.191 |



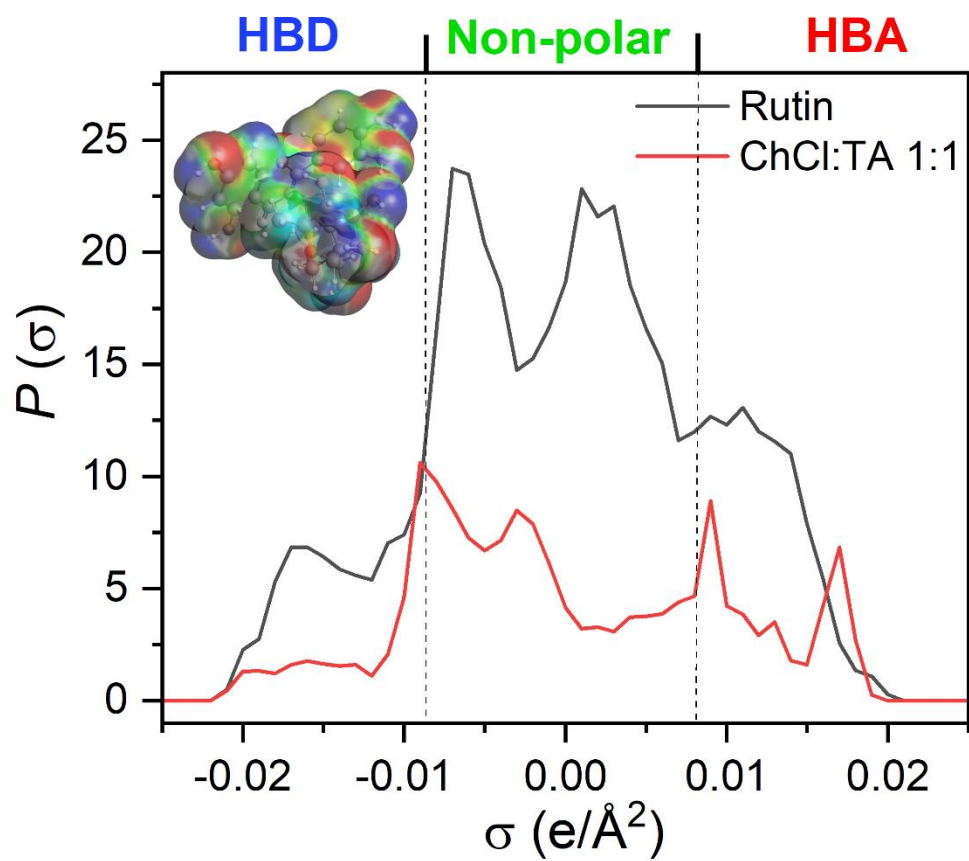

Figure S1 The sigma profiles of rutin and NADES 2 (choline chloride: tartaric acid 1:1). The surface charge density of rutin is shown in the upper left part of the graph.

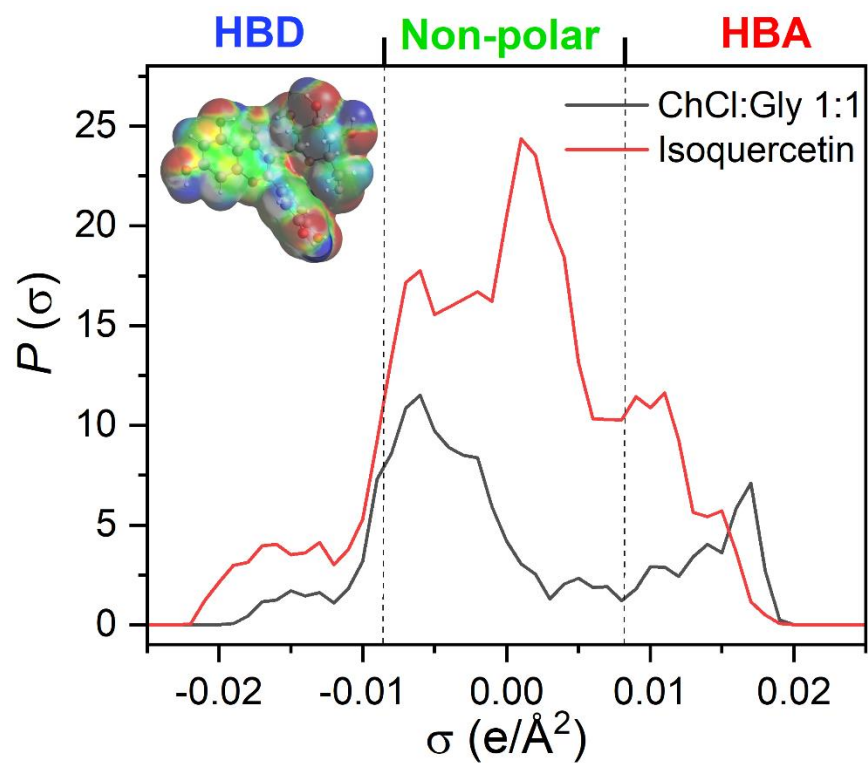

Figure S2 The sigma profiles of isoquercetin and NADES 5 (choline chloride: glycerol 1:1). The surface charge density of isoquercetin is shown in the upper left part of the graph.
